# Supplementary material for: Enhancing the performance of all vapor-deposited electron-conductor-free CsPbBr3 photodetectors via interface engineering for their applications in image sensing
Source: Royal Society of Chemistry journal article supplement (doi:10.1039/d0tc04027d), 2020-01-01
Supplement: d0tc04027d1.pdf [file d0tc04027d1.pdf]

## Enhancing the performance of all vapor-deposited electron-conductor-free CsPbBr<sub>3</sub> photodetectors via interface engineering for their applications in image sensing

Xingyue Liu<sup>a</sup>, Xianhua Tan<sup>a,b\*</sup>, Zhiyong Liu<sup>a</sup>, Xuning Zhang<sup>a</sup>, Tielin Shi<sup>a</sup> and Guanglan Liao<sup>a,c\*</sup>

<sup>a</sup> State Key Laboratory of Digital Manufacturing Equipment and Technology, Huazhong University of Science and Technology, Wuhan 430074, China

<sup>b</sup> School of Mechanical and Electrical Engineering, Central South University, Changsha 410083, China

<sup>c</sup> Shenzhen Huazhong University of Science and Technology Research Institute, Shenzhen 518057, China

\* Address correspondence to (X. Tan) [tanxianhua@hust.edu.cn](mailto:tanxianhua@hust.edu.cn); (G. Liao) [guanglan.liao@hust.edu.cn](mailto:guanglan.liao@hust.edu.cn).

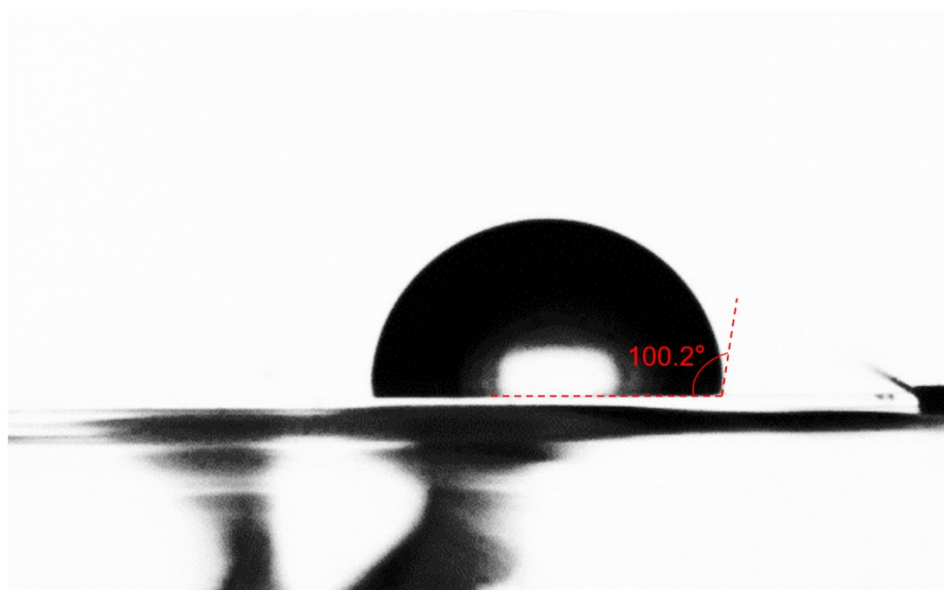

**Fig. S1.** The water contact angle measurement of the as-evaporated CuPc film.

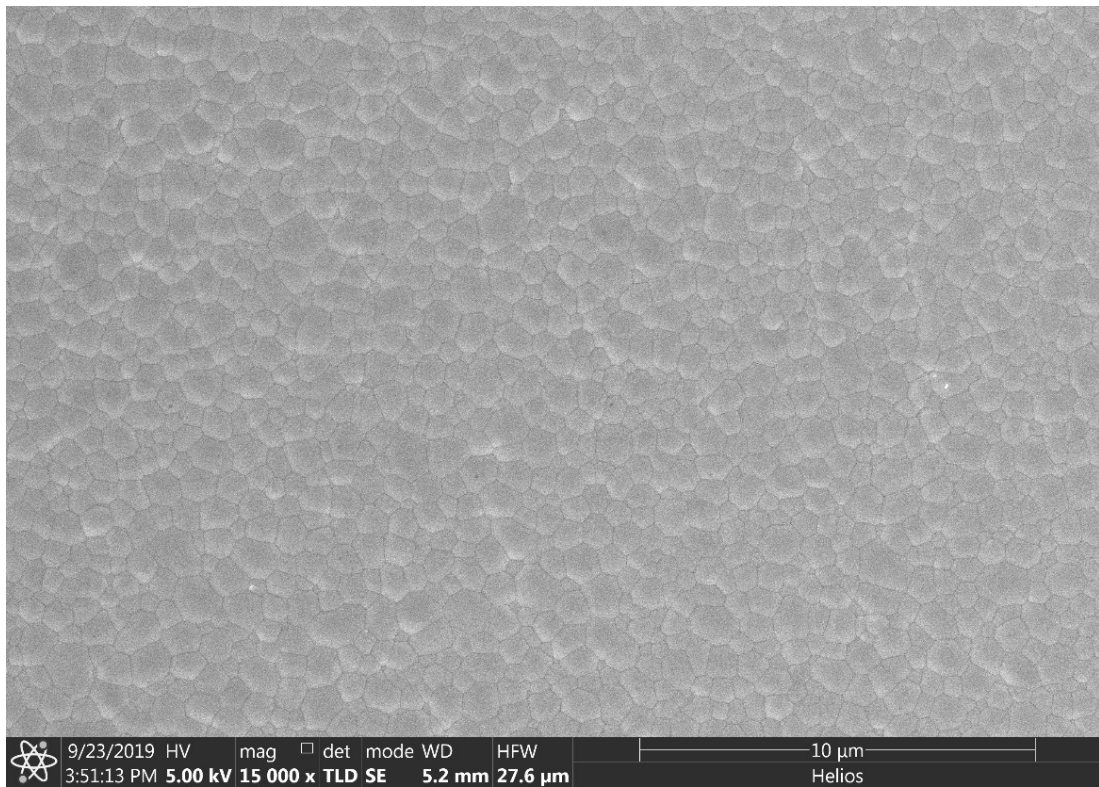

**Fig. S2.** The large-scope SEM image of the CsPbBr<sub>3</sub> films.

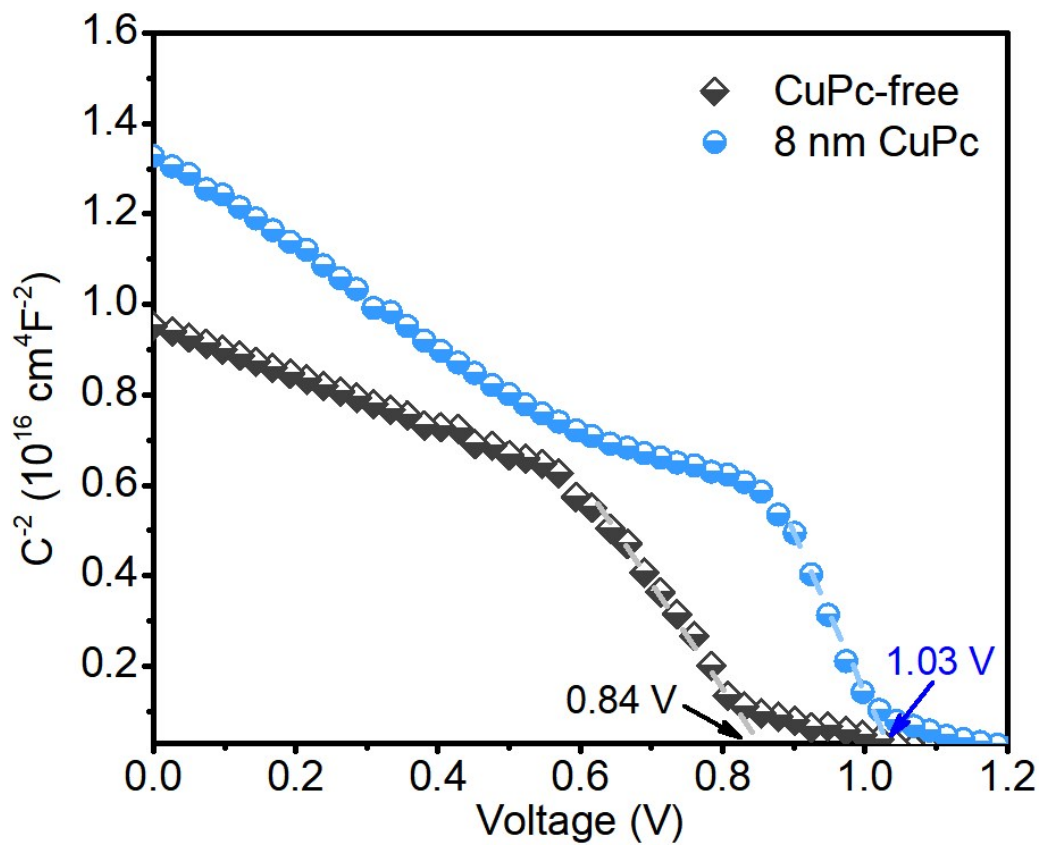

**Fig. S3.** The Mott-Schottky plots of the CuPc-free and 8 nm CuPc-based PDs.

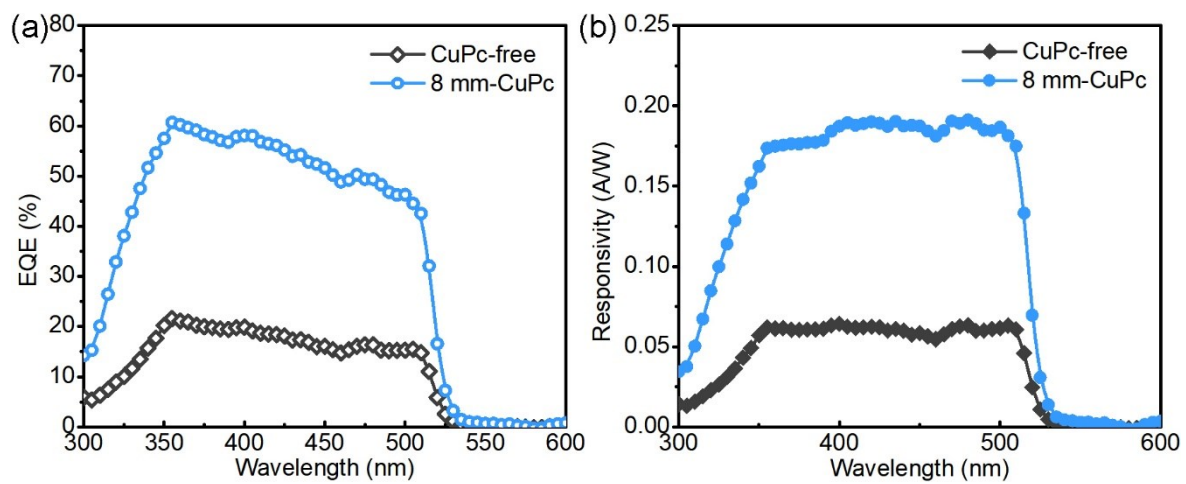

**Fig. S4.** (a) The EQE and (b) corresponding responsivity of the CuPc-free and 8 nm CuPc-based PDs.

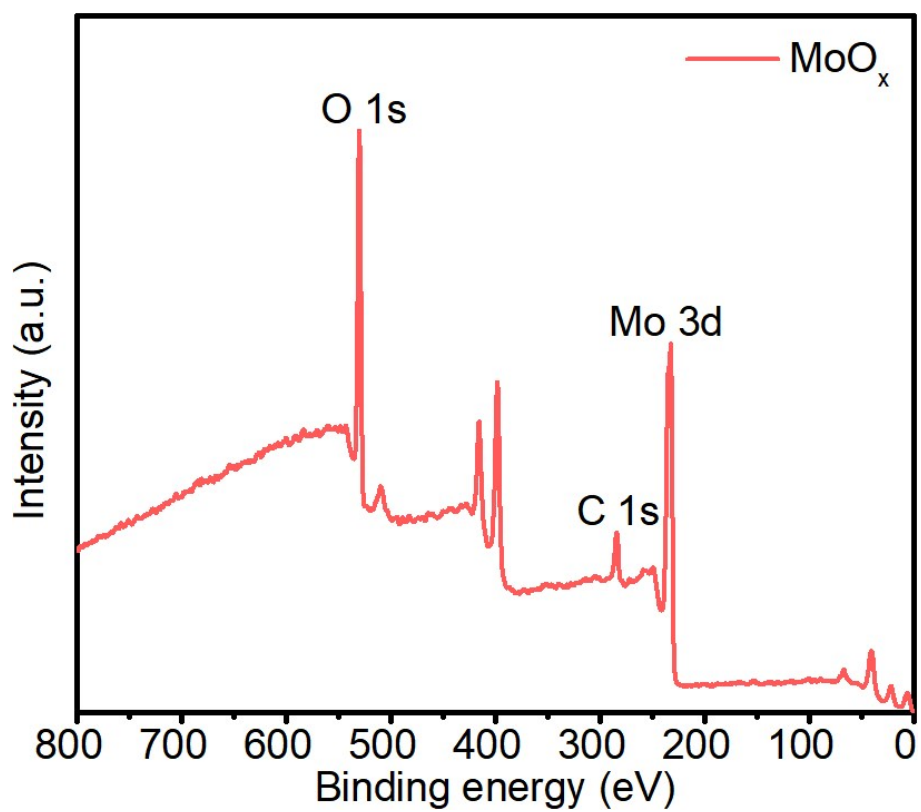

**Fig. S5.** XPS survey of the evaporated MoO<sub>3</sub> film.

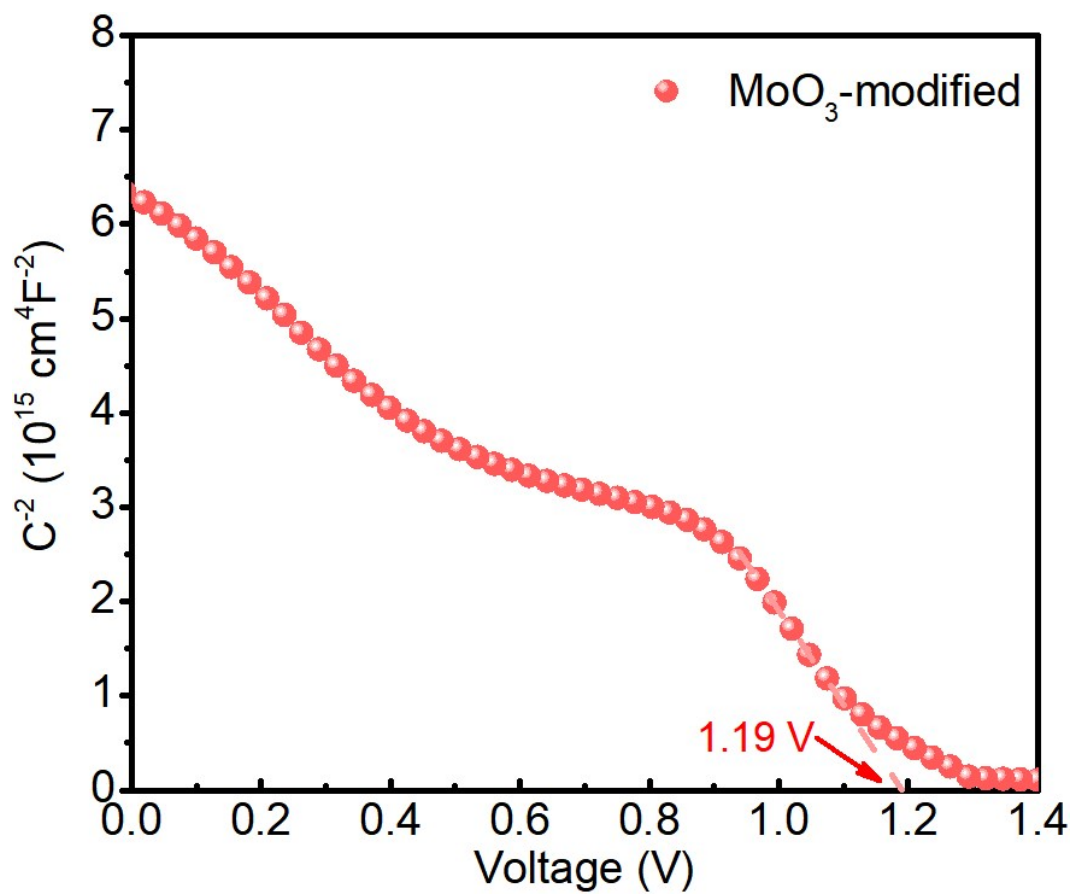

Fig. S6. The Mott-Schottky plots of the CuPc-free and 8 nm CuPc-based PDs.

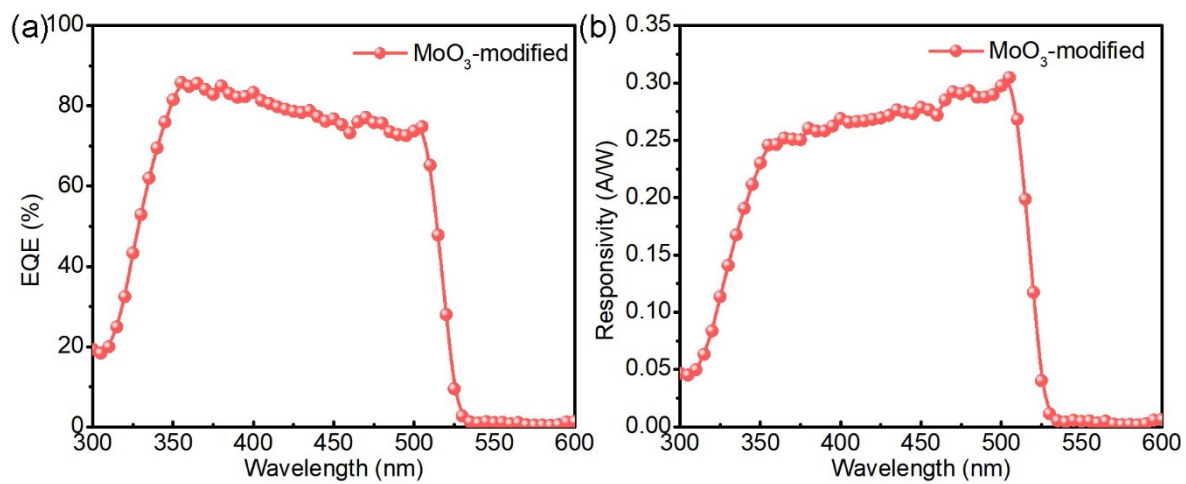

**Fig. S7.** (a) The EQE and (b) corresponding responsivity of the MoO<sub>3</sub>-modified PD.

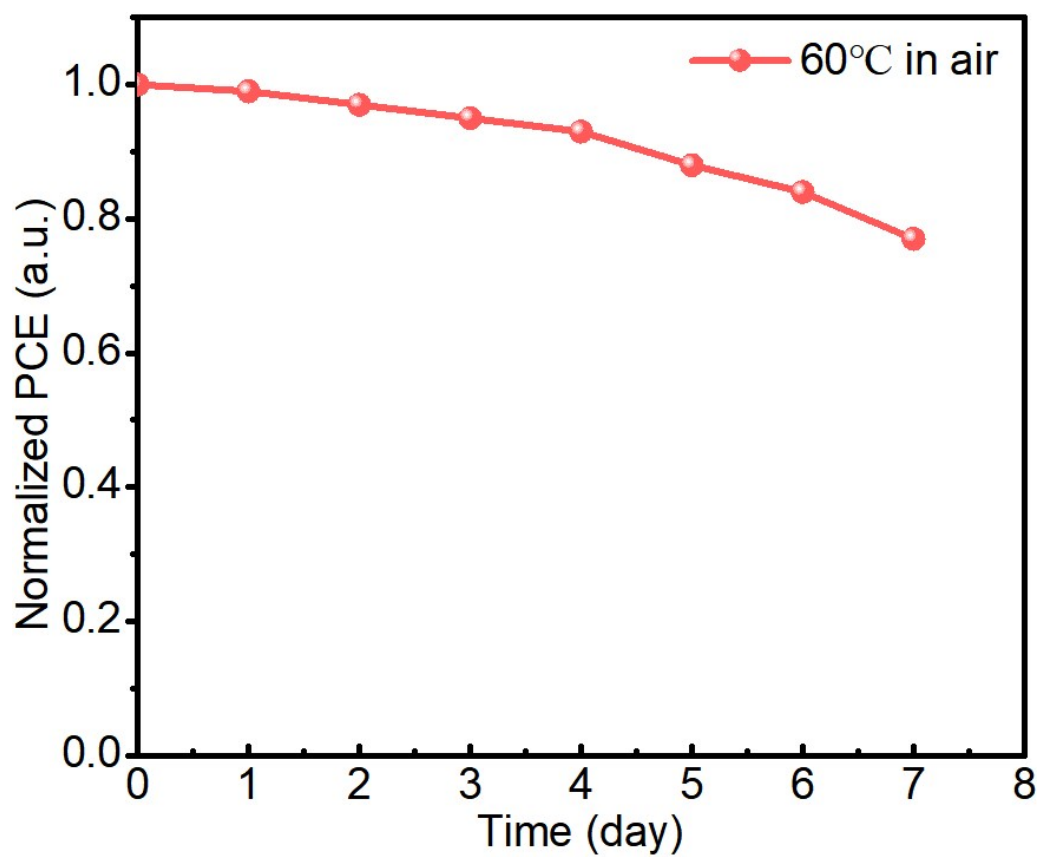

**Fig. S8.** PCE variations of the MoO<sub>3</sub>-modified PD under persistent thermal attacks at 60 °C.
